# Supplementary material
Source: Springer Nature journal article supplement (https://www.springermedizin.de/resource/supplementary/12889_2010_2391_MOESM1_ESM.pdf/9485648)

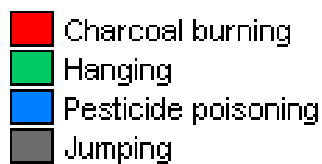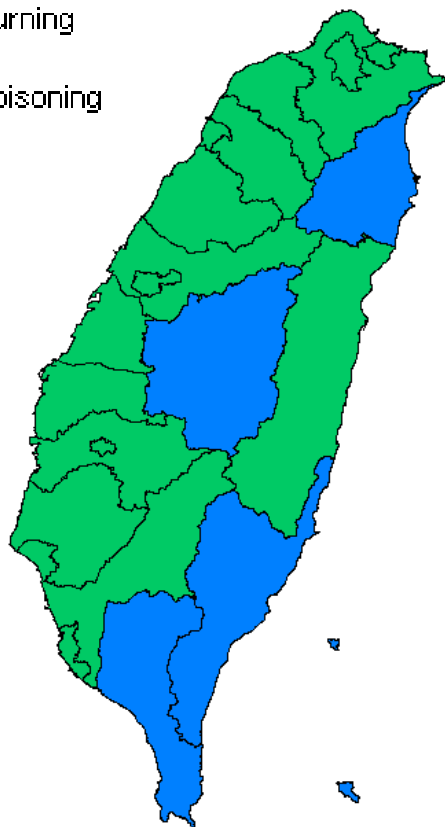

2002-04

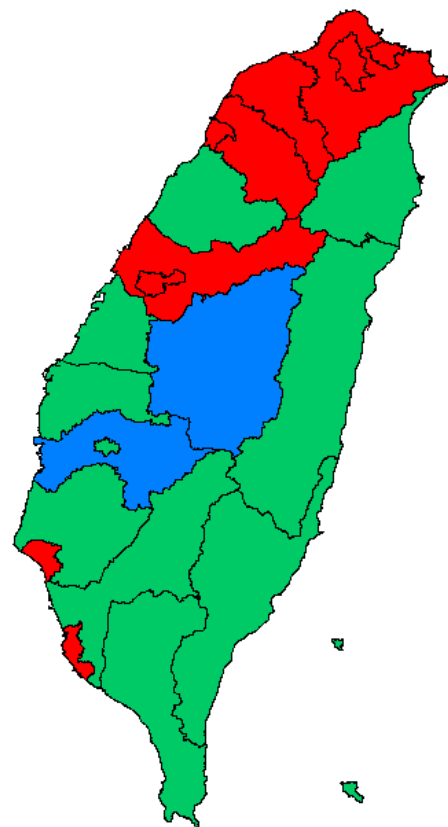

2006-08

Supplement: MOESM1 [file 9485648]
